# Supplementary material for: Surface modification of copper oxide nanosheets with CeO 2 for enhanced CO 2 reduction to C 2 H 4
Source: Royal Society of Chemistry journal article supplement (doi:10.1039/d4ta07887j), 2024-12-02
Supplement: d4ta07887j1.pdf [file d4ta07887j1.pdf]

## **Surface Modification of Copper Oxide Nanosheets with CeO<sub>2</sub> for Enhanced CO<sub>2</sub> reduction to C<sub>2</sub>H<sub>4</sub>**

*Shuaibing Yang<sup>[a]</sup>, Fanfei Sun<sup>[c]</sup>, Rong Cao<sup>[a][b]</sup>, and Minna Cao<sup>\*[a][b]</sup>*

*[a]* State Key Laboratory of Structural Chemistry, Fujian Institute of Research on the Structure of Matter, Chinese Academy of Sciences, Fuzhou 350002, P.R. China

*[b]* University of Chinese Academy of Sciences, Beijing 100049, P.R. China

*[c]* Shanghai Synchrotron Radiation Facility, Shanghai Institute of Applied Physics, Chinese Academy of Sciences, Shanghai 201204, P. R. China

Corresponding Author: [mncao@fjirsm.ac.cn](mailto:mncao@fjirsm.ac.cn) (M. Cao)

## **Materials characterizations**

Inductively coupled plasma optical emission spectroscopy (ICP-OES) measurements were tested on an Ultima 2 analyzer (Jobin Yvon). Transmission electron microscopy (TEM) images, high-resolution TEM (HRTEM) images, and corresponding energy-dispersive X-ray spectroscopy (EDS) elemental mapping images were recorded by Titan Cubed Themis G2 300 (FEI) high-resolution transmission electron microscope operated at 200 kV. X-ray diffraction (XRD) tests were performed on a Miniflex 600 diffractometer using Cu K $\alpha$  radiation ( $\lambda = 0.154$  nm). X-ray photoelectron spectroscopy (XPS) were conducted by an ESCALAB 250Xi X-ray photoelectron spectrometer (Thermo Fisher) using an Al K $\alpha$  source (15 kV, 10 mA). For reaction selectivity analysis, the gas products were detected by the FULI INSTRUMENTS GC9790Plus gas chromatograph (GC) equipped with FID and TCD, and liquid products were tested by  $^1\text{H}$  NMR on Bruker AVANCE AV III 600. The electrochemical performance measurements were conducted on a CHI1140C electrochemical workstation. The XAFS were collected at the beamline BL14W1 station of the Shanghai Synchrotron Radiation Facility (SSRF), China. The Raman experiments were performed on the Labram HR800 Evolution Raman spectrometer (HORIBA Jobin Yvon). *In situ* attenuated total reflection Fourier-transform infrared spectra (ATR-FTIR) were conducted on a Thermo Scientific Nicolet iS50.

Supplementary Figures and tables

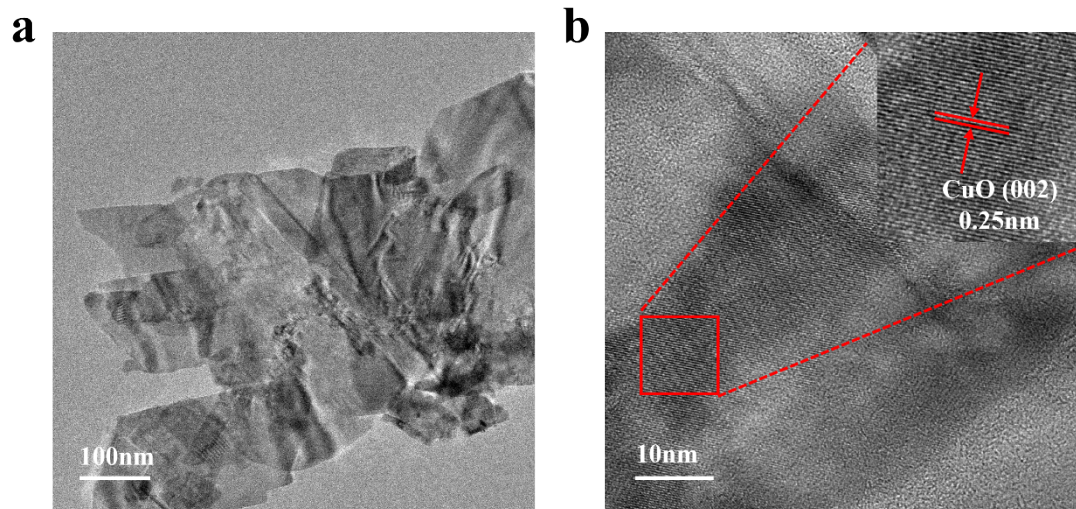

**Fig. S1** (a) TEM image, and (b) HR-TEM image of CuO NSs.

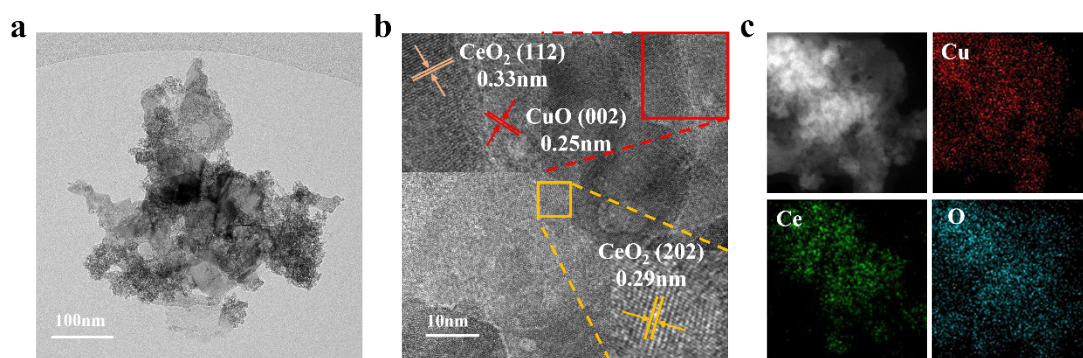

**Fig. S2** (a) TEM, (b) HR-TEM, and (c) EDS mapping of  $\text{CeO}_2/\text{CuO}$  NSs-1.

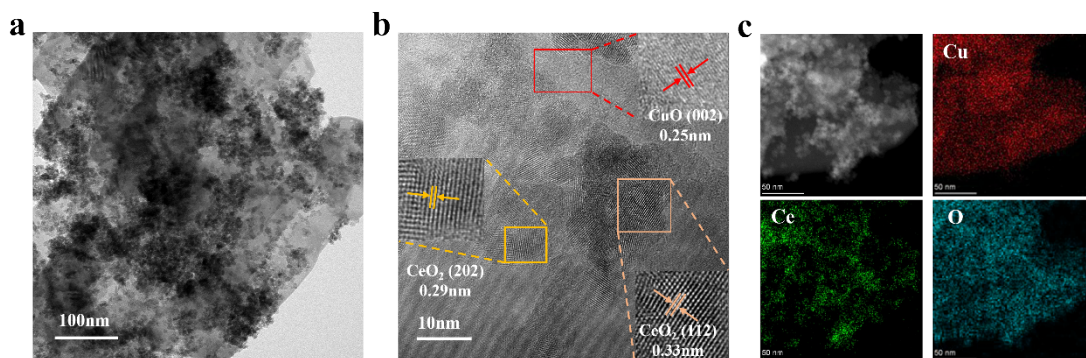

**Fig. S3** (a) TEM, (b) HR-TEM, and (c) EDS mapping of  $\text{CeO}_2/\text{CuO}$  NSs-3.

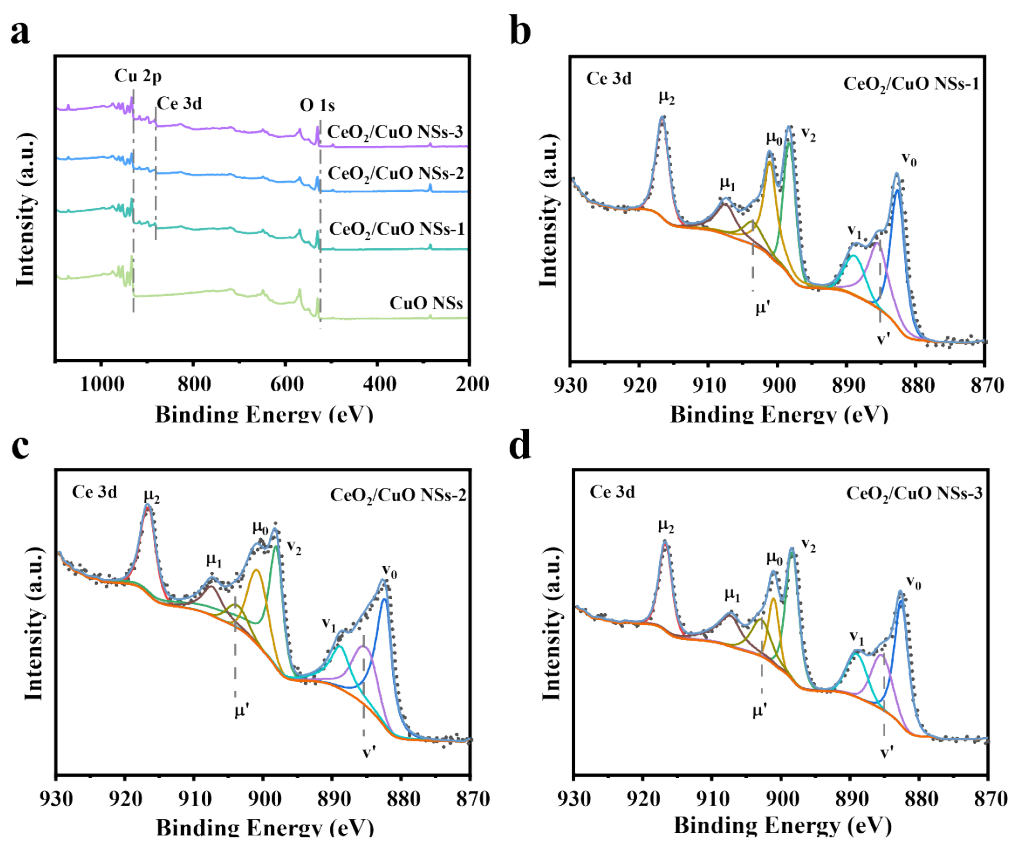

**Fig. S4** (a) The overall survey spectra of the CuO NSs and CeO<sub>2</sub> modified CuO catalysts. High-resolution Ce 3d XPS spectra of (b) CeO<sub>2</sub>/CuO NSs-1, (c) CeO<sub>2</sub>/CuO NSs-2, and (d) CeO<sub>2</sub>/CuO NSs-3.

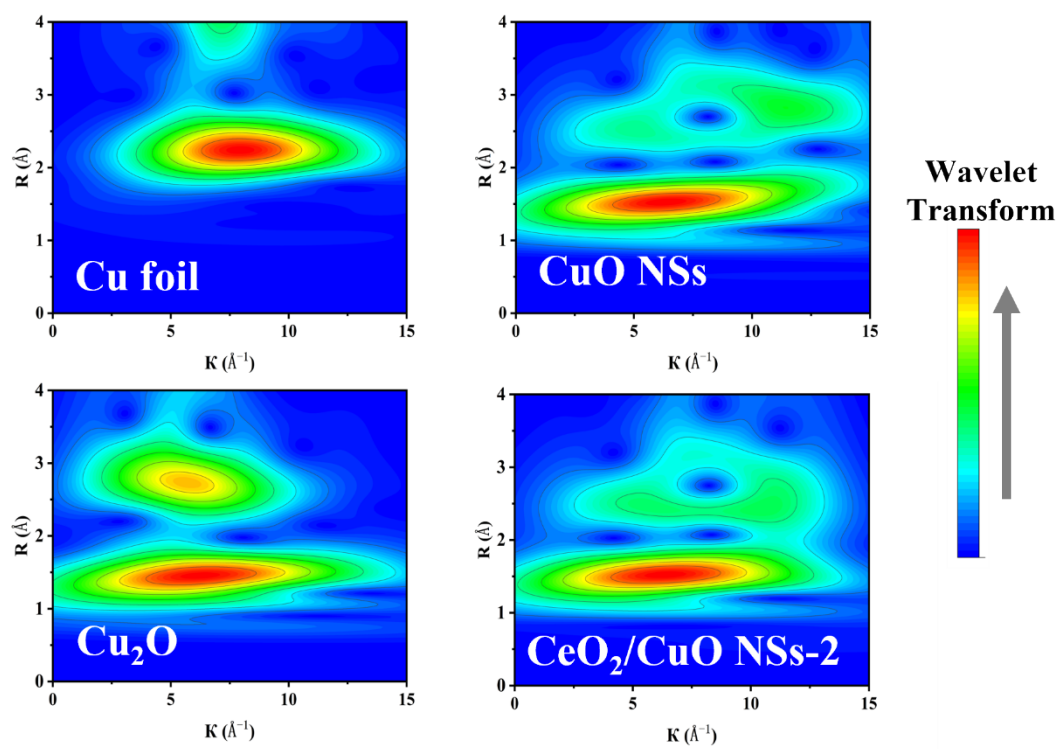

**Fig. S5** Wavelet transformed  $k^3$ -weighted EXAFS of CeO<sub>2</sub>/CuO NSs-2, CuO NSs, Cu<sub>2</sub>O, and Cu foil.

**a**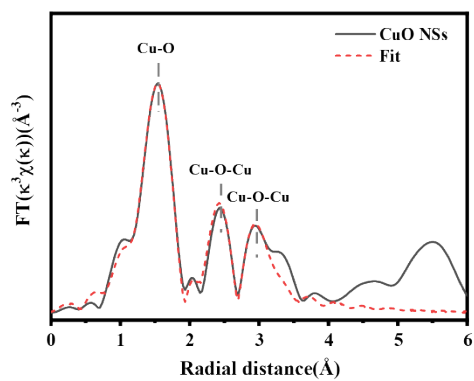**b**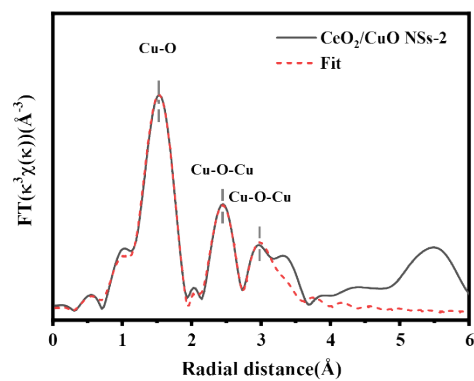

**Fig. S6** Experimental and fitting K-edge EXAFS spectra for (a) CuO NSs and (b) CeO<sub>2</sub>/CuO NSs-2



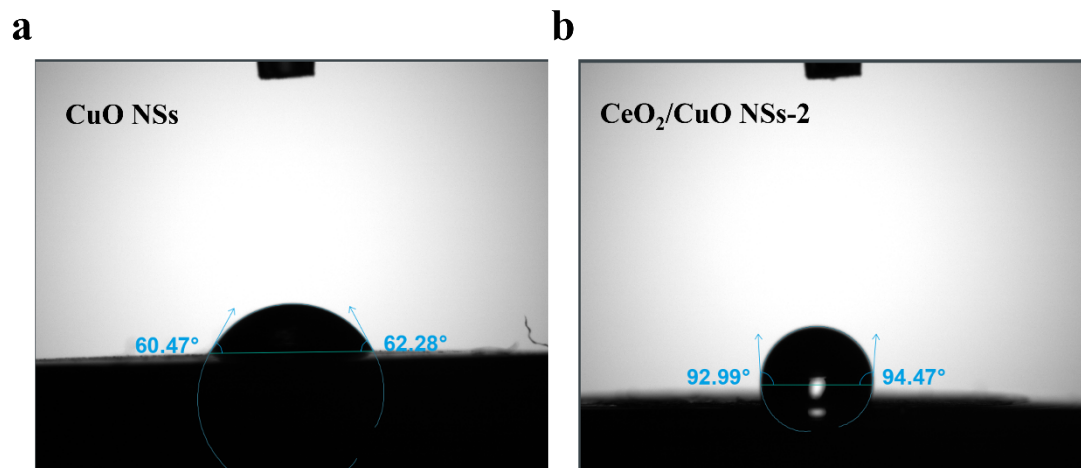

**Fig. S7** Water contact angle measurement images of (a) CuO NSs, and (b) CeO<sub>2</sub>/CuO NSs-2.

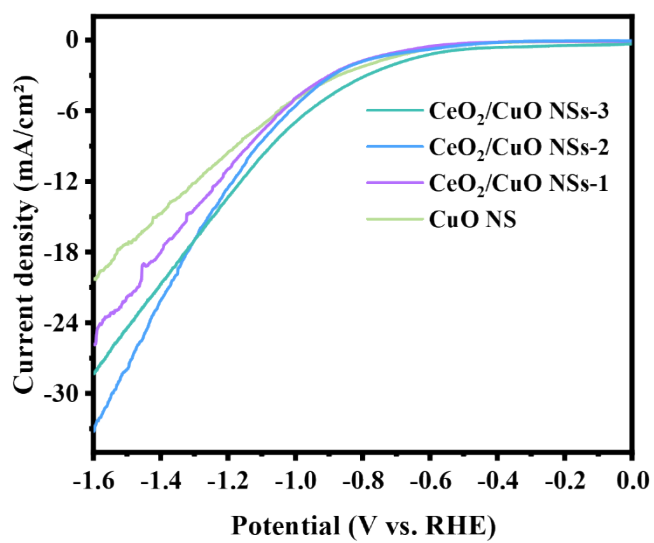

**Fig. S8** LSV curves for difference samples in CO<sub>2</sub> saturated electrolyte in a H-Cell with 0.1M KHCO<sub>3</sub> + 0.1M KCl.

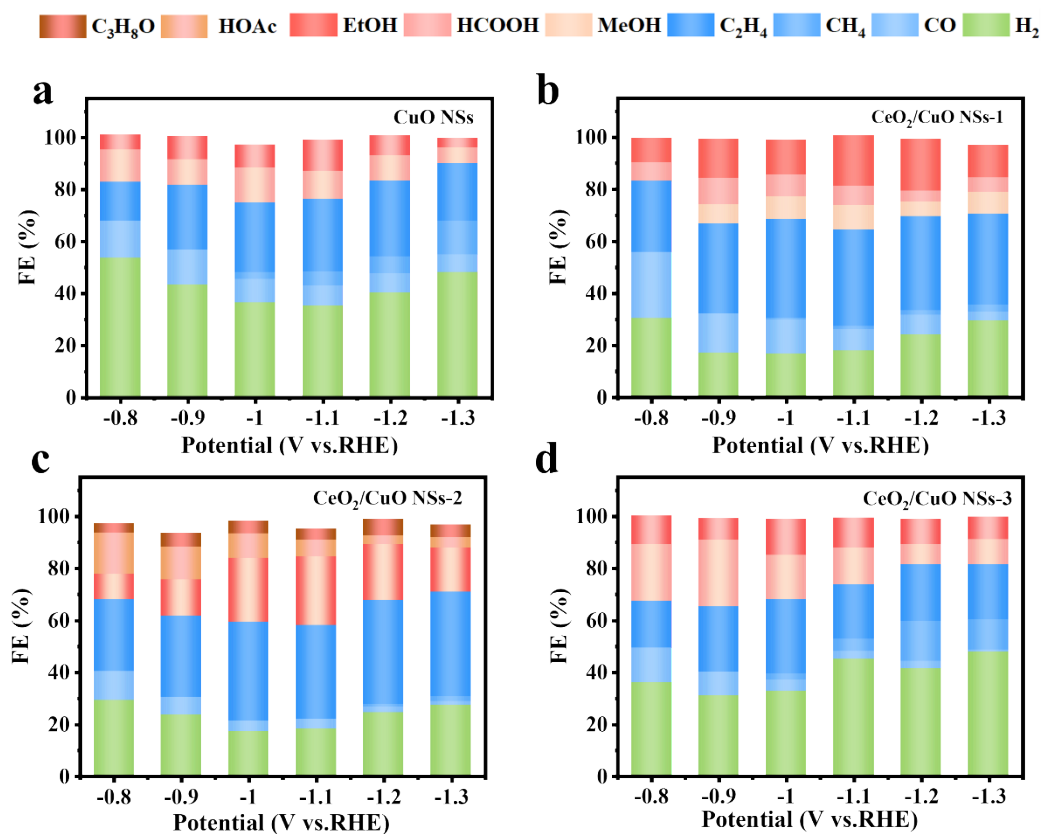

**Fig. S9** The selectivity of CO<sub>2</sub>RR in H-Cell with 0.1M KHCO<sub>3</sub> + 0.1M KCl for (a) CuO NSs, (b) CeO<sub>2</sub>/CuO NSs-1, (c) CeO<sub>2</sub>/CuO NSs-2, and (d) CeO<sub>2</sub>/CuO NSs-3 at different potentials.

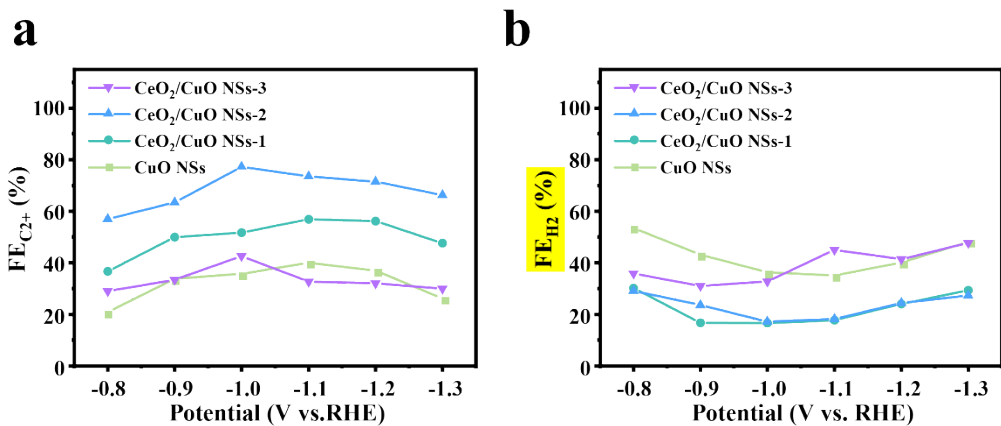

**Fig. S10** (a) Faradaic efficiencies of C<sub>2</sub><sup>+</sup> over different samples at different potential in a H-Cell. (b) Faradaic efficiencies of H<sub>2</sub> over different samples at different potential in a H-Cell with 0.1M KHCO<sub>3</sub> + 0.1M KCl.

**a**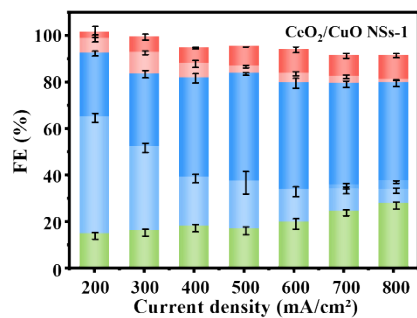**b**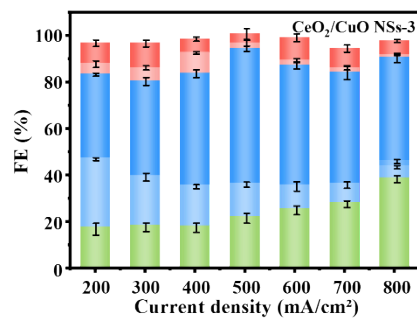

EtOH HCOOH C<sub>2</sub>H<sub>4</sub> CH<sub>4</sub> CO H<sub>2</sub>

**Fig. S11** The selectivity of CO<sub>2</sub>RR in Flow Cell with 1M KOH for (a) CeO<sub>2</sub>/CuO NSs-1, and (b) CeO<sub>2</sub>/CuO NSs-3 at different potentials.

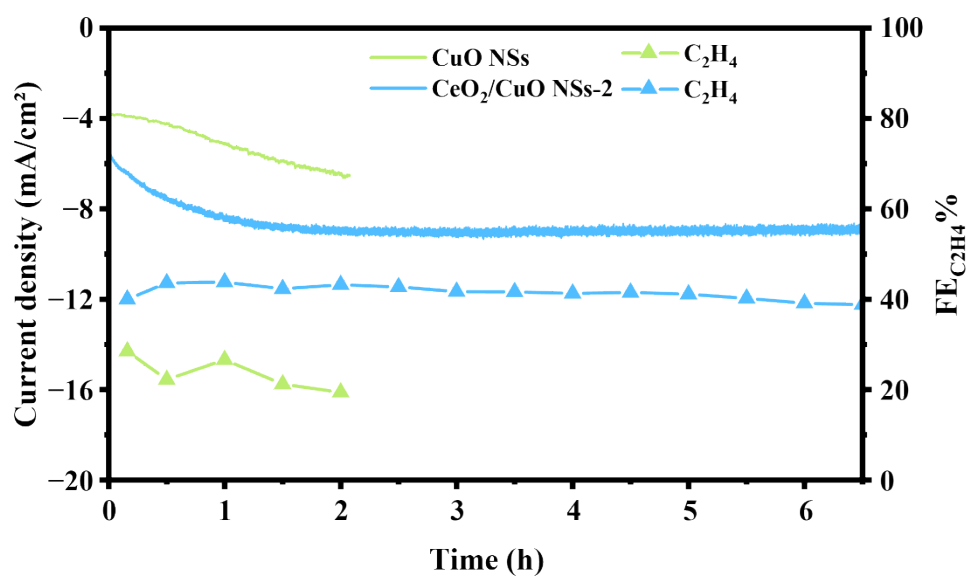

**Fig. S12** Stability test of CeO<sub>2</sub>/CuO NSs-2 and CuO NSs at -1.0V vs. RHE in H-Cell.

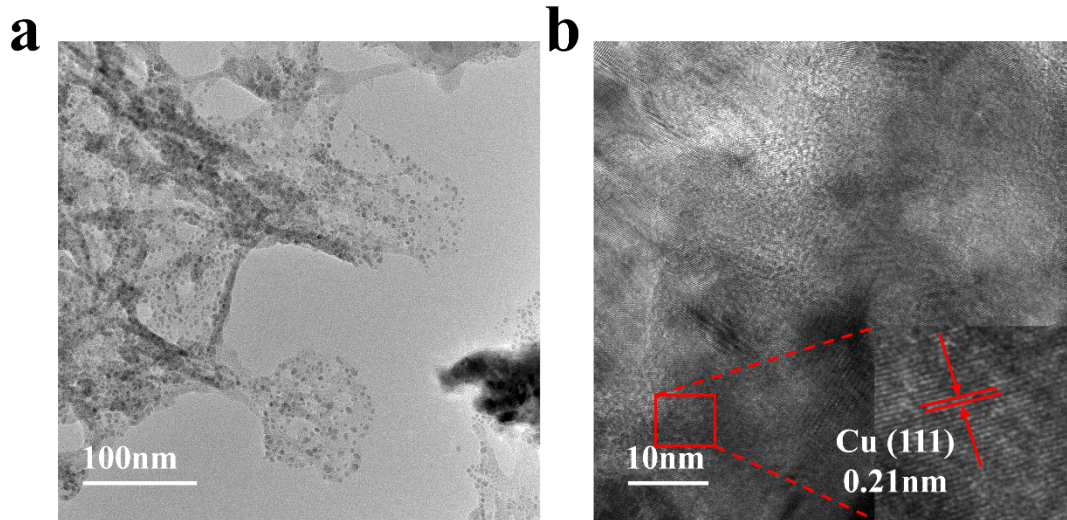

**Fig. S13** (a) TEM, and (b) HR-TEM of CuO NSs after 0.5h CO<sub>2</sub>RR at -1.0V vs. RHE.

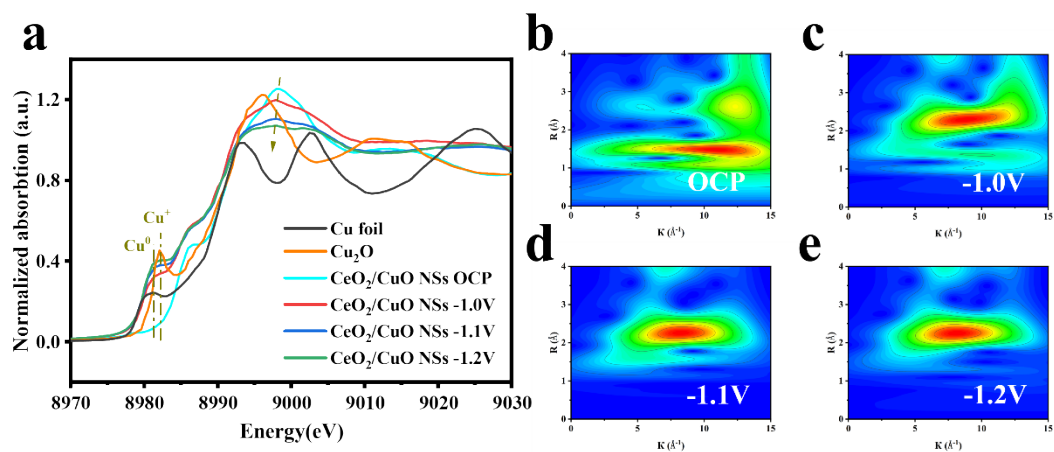

**Fig. S14** (a) Cu K-edge XANES spectra, (b) Wavelet transformed  $k^3$ -weighted EXAFS of CeO<sub>2</sub>/CuO NSs-2 at different potential.



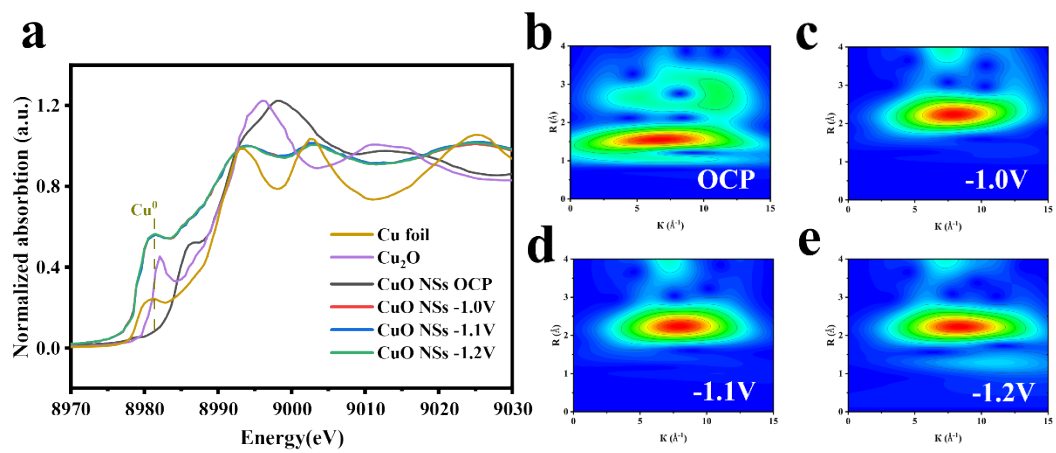

**Fig. S15** (a) Cu K-edge XANES spectra, (b) Wavelet transformed  $k^3$ -weighted EXAFS of  $\text{Cu}_7\text{CeO}_x$  NSs at different potential.

**Table S1** Ratio of elements determined by ICP-OES

| Samples                     | Weight fraction (%) |       | Cu : Ce  |
|-----------------------------|---------------------|-------|----------|
|                             | Cu                  | Ce    |          |
| CeO <sub>2</sub> /CuO NSs-1 | 64.16               | 14.25 | 9.92 : 1 |
| CeO <sub>2</sub> /CuO NSs-2 | 46.18               | 12.13 | 8.39 : 1 |
| CeO <sub>2</sub> /CuO NSs-3 | 53.44               | 18.02 | 6.52 : 1 |

**Table S2** Ratio of elements determined by XPS

| Samples                     | Cu (%) | Ce (%) |
|-----------------------------|--------|--------|
| CuO NSs                     | 100    |        |
| CeO <sub>2</sub> /CuO NSs-1 | 68.75  | 31.25  |
| CeO <sub>2</sub> /CuO NSs-2 | 62.96  | 37.04  |
| CeO <sub>2</sub> /CuO NSs-3 | 58.33  | 41.67  |

**Table S3** Comparison of the C<sub>2</sub>H<sub>4</sub> selectivity of the present work with that of the catalysts reported in the literature.

| <b>Catalyst</b>                 | <b>Current density<br/>(mA/cm<sup>2</sup>)</b> | <b>FE%</b> | <b>Electrolyte</b>      | <b>Ref.</b> |
|---------------------------------|------------------------------------------------|------------|-------------------------|-------------|
| CeO <sub>2</sub> /CuO NSs-2     | 600                                            | 64.1 %     | 1 M KOH                 | This work   |
| Cu/Ni-NAC                       | 100                                            | 66%        | 10 M KOH                | Ref. 1      |
| MgAl-LDH/Cu                     | 300                                            | 55.1%      | 1 M KHCO <sub>3</sub>   | Ref. 2      |
| La(OH) <sub>3</sub> /Cu         | 1000                                           | 40.8%      | 1 M KOH                 | Ref. 3      |
| CuAg film                       | 300                                            | 60%        | 1 M KOH                 | Ref. 4      |
| Cu nanowires with surface steps | 23                                             | 77%        | 0.1 M KHCO <sub>3</sub> | Ref. 5      |
| p-CuO <sub>x</sub> -Cu          | 14                                             | 42%        | 0.1 M KHCO <sub>3</sub> | Ref. 6      |

## References

1. Z. Yin, J. Yu, Z. Xie, S.-W. Yu, L. Zhang, T. Akauola, J. G. Chen, W. Huang, L. Qi and S. Zhang, *J. Am. Chem. Soc.*, 2022, **144**, 20931-20938.
2. Y. N. Xu, W. Li, H. Q. Fu, X. Y. Zhang, J. Y. Zhao, X. Wu, H. Y. Yuan, M. Zhu, S. Dai, P. F. Liu and H. G. Yang, *Angew. Chem. Int. Ed.*, 2023, **62**, e202217296.
3. S. Hu, Y. Chen, Z. Zhang, S. Li, H. Liu, X. Kang, J. Liu, S. Ge, J. Wang, W. Lv, Z. Zeng, X. Zou, Q. Yu and B. Liu, *Small*, 2024, **20**, 2308226.
4. T. T. H. Hoang, S. Verma, S. Ma, T. T. Fister, J. Timoshenko, A. I. Frenkel, P. J. A. Kenis and A. A. Gewirth, *J. Am. Chem. Soc.*, 2018, **140**, 5791-5797.
5. C. Choi, S. Kwon, T. Cheng, M. Xu, P. Tieu, C. Lee, J. Cai, H. M. Lee, X. Pan, X. Duan, W. A. Goddard and Y. Huang, *Nat. Catal.*, 2020, **3**, 804-812.
6. J. Fu, H. Zhang, H. Du, X. Liu, Z.-H. Lyu, Z. Jiang, F. Chen, L. Ding, T. Tang, W. Zhu, D. Su, C. Ling, J. Wang and J.-S. Hu, *J. Am. Chem. Soc.*, 2024, **146**, 23625-23632.
